# Supplementary material for: Mechanochemical synthesis of Cu(i)-N-heterocyclic carbene complexes
Source: Royal Society of Chemistry journal article supplement (doi:10.1039/d0gc01923b), 2020-01-01
Supplement: d0gc01923b1.pdf [file d0gc01923b1.pdf]

## Supporting Information

for

### Mechanochemical Synthesis of Cu(I)-N-Heterocyclic Carbene Complexes

*Gianmarco Pisanò and Catherine S. J. Cazin\**

Department of Chemistry and Centre for Sustainable Chemistry, Ghent University, Krijgslaan 281 – S3, 9000 Ghent, Belgium. E-mail: [catherine.cazin@ugent.be](mailto:catherine.cazin@ugent.be).

#### Contents

|                                      |           |
|--------------------------------------|-----------|
| <b>General information .....</b>     | <b>S2</b> |
| <b>Synthesis of complexes .....</b>  | <b>S2</b> |
| General procedure .....              | S2        |
| [Cu(Cl)(IPr)] - Small scale .....    | S2        |
| [Cu(Cl)(IPr)] - Large scale .....    | S2        |
| Synthesis of [Cu(Cl)(SIPr)] .....    | S3        |
| Synthesis of [Cu(Cl)(IMes)] .....    | S3        |
| Synthesis of [Cu(Cl)(SIMes)] .....   | S3        |
| Synthesis of [Cu(Cl)(IPr*)] .....    | S4        |
| Synthesis of [Cu(Cl)(ItBu)] .....    | S4        |
| Synthesis of [Cu(Cl)(MIC)] .....     | S4        |
| <b>NMR spectra of complexes.....</b> | <b>S5</b> |
| <b>References.....</b>               | <b>S8</b> |

## General information

Ball-milling experiments were performed in a planetary mill (Pulverisette 5/4, Fritsch). NMR spectra were recorded on a Bruker ADVANCE 400 MHz spectrometer. NMR chemical shifts are reported in ppm with solvent residual peak as reference ( $\text{CHCl}_3$ :  $\delta_{\text{H}} = 7.26$  ppm) at 298K.  $\text{CDCl}_3$ ,  $\text{K}_2\text{CO}_3$  and  $\text{CuCl}$  were purchased and used as received. (S)IPr·HCl, (S)IMes·HCl, IPr\*·HCl,  $t\text{Bu}\cdot\text{HCl}$  and MIC·HCl were synthesized following literature procedures.<sup>1-5</sup> Silica gel P60 (230-400 mesh) was used for chromatography.

## Synthesis of complexes

### General procedure

A 12 mL milling jar ( $\text{ZrO}_2$ ) equipped with 18 balls 5 mm  $\varnothing$  ( $\text{ZrO}_2$ ) was charged with NHC·HCl and  $\text{CuCl}$  which were ground (400 rpm) for 10 min.  $\text{K}_2\text{CO}_3$  was added and the reaction mixture was ground for 3 x 30 min (400 rpm). The crude product was extracted ( $\text{CH}_2\text{Cl}_2$  or acetone) and filtered ( $\text{SiO}_2$ ). After concentration, pentane was added, and the product was collected by filtration. When the product was extracted from the reactor using acetone, filtration through  $\text{SiO}_2$  and reducing of the solvent volume by vacuum permits the product to precipitate and alleviates the need for pentane co-solvent use.

### [Cu(Cl)(IPr)] - Small scale

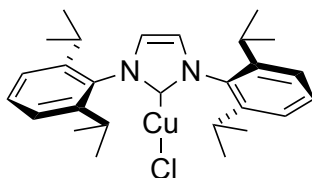

Following the general procedure with IPr·HCl (200 mg, 0.471 mmol),  $\text{CuCl}$  (47 mg, 0.471 mmol) and  $\text{K}_2\text{CO}_3$  (195 mg, 1.412 mmol),  $[\text{Cu}(\text{Cl})(\text{IPr})]$  was obtained as a colourless solid in 78% yield (178 mg, 0.365 mmol). When the product was extracted from the reactor using acetone, filtration through  $\text{SiO}_2$  and reducing of the solvent volume by vacuum permits the product to precipitate and alleviates the need for pentane co-solvent use. This acetone extraction/filtration/precipitation leads to yields of 76% yield

### [Cu(Cl)(IPr)] - Large scale

A 500 mL milling jar ( $\text{ZrO}_2$ ) equipped with 764 balls 5 mm  $\varnothing$  ( $\text{ZrO}_2$ ) was charged with IPr·HCl (5.0 g, 11.76 mmol),  $\text{CuCl}$  (1.16 g, 11.76 mmol) and  $\text{K}_2\text{CO}_3$  (4.88 g, 35.29 mmol). The reaction mixture was ground for 10 min (400 rpm). The crude product was extracted with ( $\text{CH}_2\text{Cl}_2$ ) and filtered ( $\text{SiO}_2$ ). After concentration, pentane was added and the product was collected by filtration.  $[\text{Cu}(\text{Cl})(\text{IPr})]$  was obtained as a colourless solid in 75% yield (4.30 g, 8.82 mol).

$^1\text{H}$  NMR (400 MHz,  $\text{CDCl}_3$ , 298K)  $\delta = 1.24$  (d,  $^3J_{\text{HH}} = 8$  Hz, 12H,  $\text{CH}-\underline{\text{CH}_3}$ ), 1.31 (d,  $^3J_{\text{HH}} = 6.8$  Hz, 12H,  $\text{CH}-\underline{\text{CH}_3}$ ), 2.58 (spt,  $^3J_{\text{HH}} = 6.9$  Hz, 4H,  $\underline{\text{CH}}-\text{CH}_3$ ), 7.14 (s, 2H,  $\text{NCH}=\text{CHN}$ ), 7.31 (d,  $J=7.8$  Hz, 4H, ArH), 7.47-7.53 (m, 2 H, ArH). The spectrum matches data from the literature.<sup>6</sup>

### Synthesis of [Cu(Cl)(SIPr)]

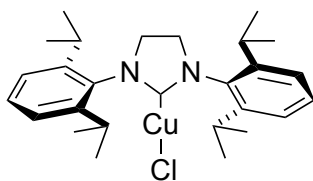

Following the general procedure with SIPr·HCl (200 mg, 0.47 mmol), CuCl (46 mg, 0.47 mmol) and K<sub>2</sub>CO<sub>3</sub> (194 mg, 1.40 mmol), [Cu(Cl)(SIPr)] was obtained as a colourless solid in 66% yield (151 mg, 0.31 mmol).

<sup>1</sup>H NMR (400 MHz, CDCl<sub>3</sub>, 298K): δ = 1.37 (app. t, 24H, CH-CH<sub>3</sub>), 3.08 (spt, <sup>3</sup>J<sub>HH</sub> = 6.9 Hz, 4H, CH-CH<sub>3</sub>) 4.03 (s, 4H, NCH<sub>2</sub>CH<sub>2</sub>N), 7.23-7.29 (m, 4H, ArH), 7.23-7.29 (m, 2H, ArH). The spectrum matches data from the literature.<sup>6</sup>

### Synthesis of [Cu(Cl)(IMes)]

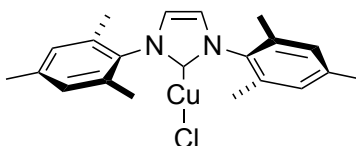

Following the general procedure with IMes·HCl (200 mg, 0.59 mmol), CuCl (58 mg, 0.59 mmol) and K<sub>2</sub>CO<sub>3</sub> (243 mg, 1.76 mmol), [Cu(Cl)(IMes)] was obtained as a colourless solid in 65% yield (154 mg, 0.38 mmol).

<sup>1</sup>H NMR (400 MHz, CDCl<sub>3</sub>, 298K): δ = 2.11 (s, 12H, CH<sub>3</sub>), 2.36 (s, 6H, CH<sub>3</sub>), 7.01 (s, 4H, ArH), 7.06 (s, 2H, NCH=CHN). The spectrum matches data from the literature.<sup>6</sup>

### Synthesis of [Cu(Cl)(SIMes)]

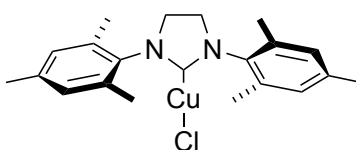

Following the general procedure with SIMes·HCl (200 mg, 0.58 mmol), CuCl (58 mg, 0.58 mmol) and K<sub>2</sub>CO<sub>3</sub> (242 mg, 1.75 mmol), [Cu(Cl)(SIMes)] was obtained as a colourless solid in 53% yield (124 mg, 0.31 mmol).

<sup>1</sup>H NMR (400 MHz, CDCl<sub>3</sub>, 298K): δ = 2.31 (s, 6H, CH<sub>3</sub>), 2.32 (s, 6H, CH<sub>3</sub>), 3.96 (s, 4H, NCH<sub>2</sub>CH<sub>2</sub>N), 6.96 (s, 4H, ArH). The spectrum matches data from the literature.<sup>6</sup>

### Synthesis of [Cu(Cl)(IPr\*)]

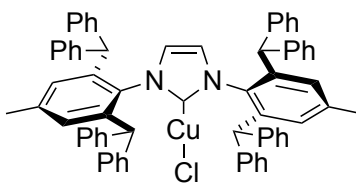

Following the general procedure with IPr\*·HCl (200 mg, 0.21 mmol), CuCl (21 mg, 0.21 mmol) and K<sub>2</sub>CO<sub>3</sub> (87 mg, 0.63 mmol), [Cu(Cl)(IPr\*)] was obtained as a colourless solid in 72% yield (152 mg, 0.15 mmol).

<sup>1</sup>H NMR (400 MHz, CDCl<sub>3</sub>, 298K): δ= 2.23 (s, 6H, CH<sub>3</sub>), 5.20 (s, 4H, CH-Ph<sub>2</sub>), 5.82 (s, 2H, NCH=CHN), 6.85 (s, 4H, ArH), 6.87-6.93 (m, 8H, ArH), 7.02 (m, 8H, ArH), 7.12-7.23 (m, 24H, ArH). The spectrum matches data from the literature.<sup>6</sup>

### Synthesis of [Cu(Cl)(ItBu)]

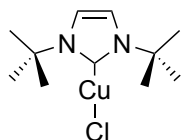

Following the general procedure with ItBu·HCl (200 mg, 0.92 mmol), CuCl (91 mg, 0.92 mmol) and K<sub>2</sub>CO<sub>3</sub> (383 mg, 2.77 mmol), [Cu(Cl)(ItBu)] was obtained as a colourless solid in 48% yield (124 mg, 0.44 mmol).

<sup>1</sup>H NMR (400 MHz, CDCl<sub>3</sub>, 298K): δ= 1.79 (s, 18H, C(CH<sub>3</sub>)<sub>3</sub>), 7.05 (s, 2H, NCH=CHN). The spectrum matches data from the literature.<sup>6</sup>

### Synthesis of [Cu(Cl)(MIC)]

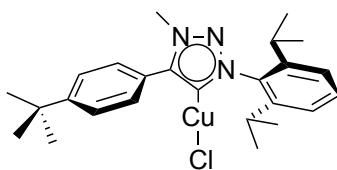

Following the general procedure with MIC·HCl (200 mg, 0.49 mmol), CuCl (48 mg, 0.49 mmol) and K<sub>2</sub>CO<sub>3</sub> (201 mg, 1.46 mmol), [Cu(Cl)(MIC)] was obtained as a colourless solid in 36% yield (83 mg, 0.17 mmol).

<sup>1</sup>H NMR (400 MHz, CDCl<sub>3</sub>, 298K): δ= 1.17 (d, <sup>3</sup>J<sub>HH</sub> = 6.8 Hz, 6H, CH-CH<sub>3</sub>), 1.31 (d, <sup>3</sup>J<sub>HH</sub> = 6.8 Hz, 6H, CH-CH<sub>3</sub>), 1.39 (s, 9H, C(CH<sub>3</sub>)<sub>3</sub>), 2.32 (sept, <sup>3</sup>J<sub>HH</sub> = 6.8 Hz, 2H, CH(CH<sub>3</sub>)<sub>2</sub>), 4.25 (s, 3H, N-CH<sub>3</sub>), 7.29-7.30 (m, 2H, ArH), 7.51-7.55 (m, 1H, ArH), 7.55-7.60 (m, 2H, ArH), 7.67-7.73 (m, 2H, ArH). The spectrum matches data from the literature.<sup>5</sup>

# NMR spectra of complexes

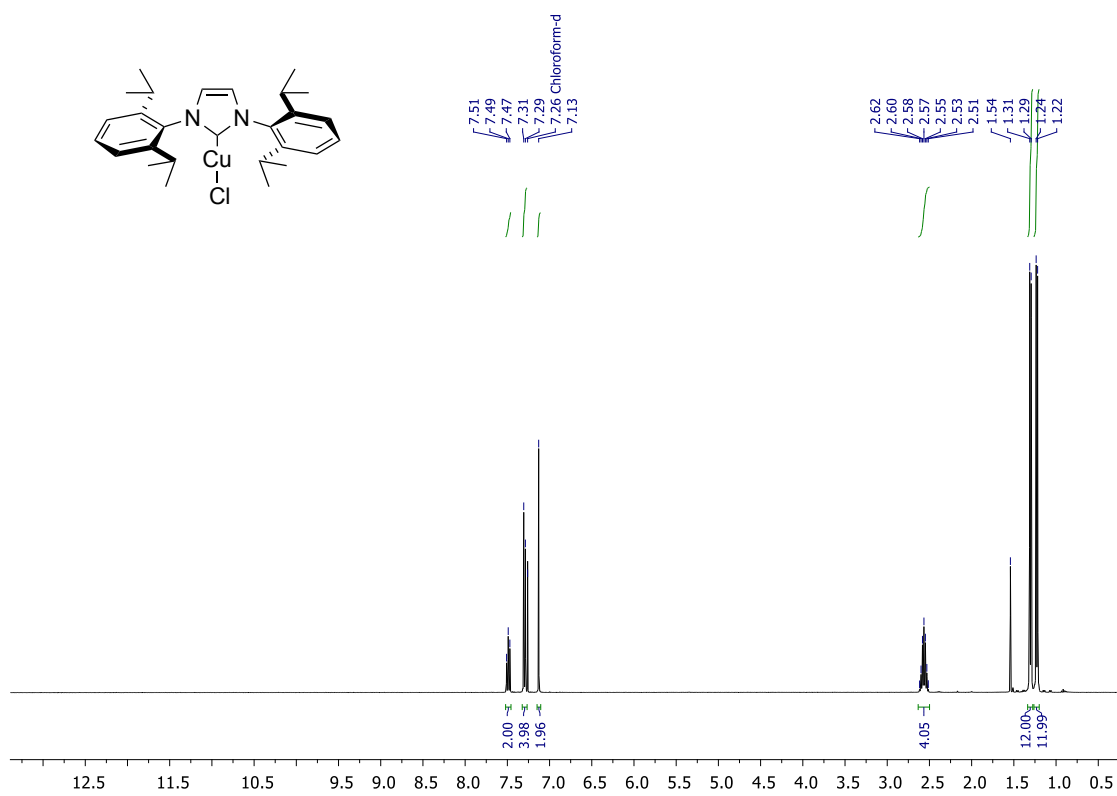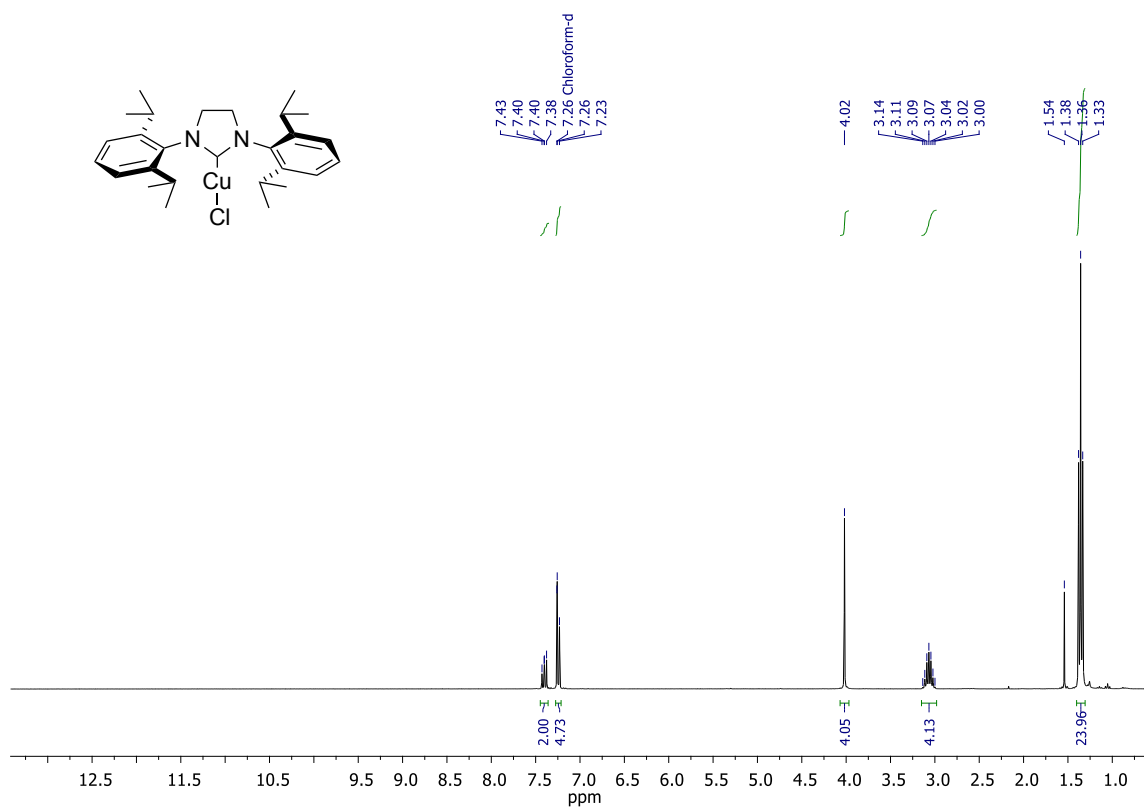

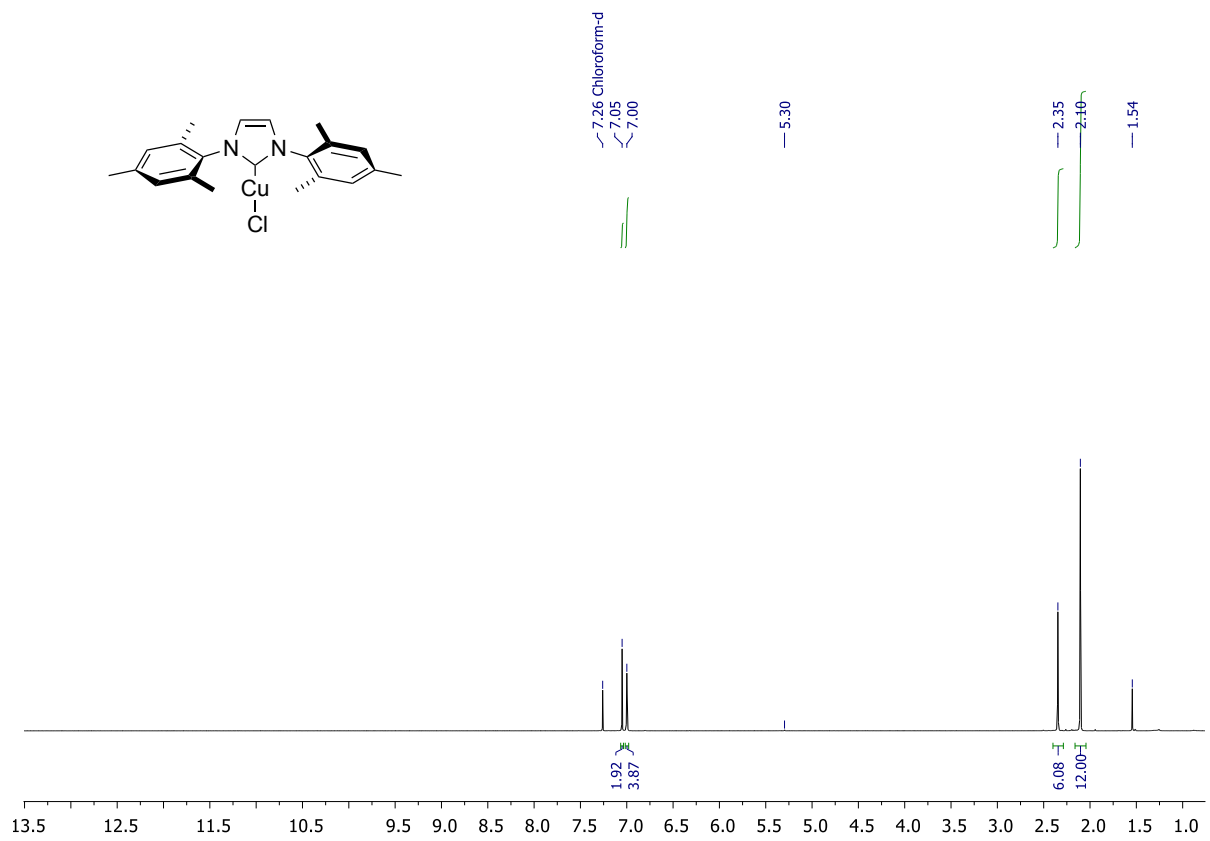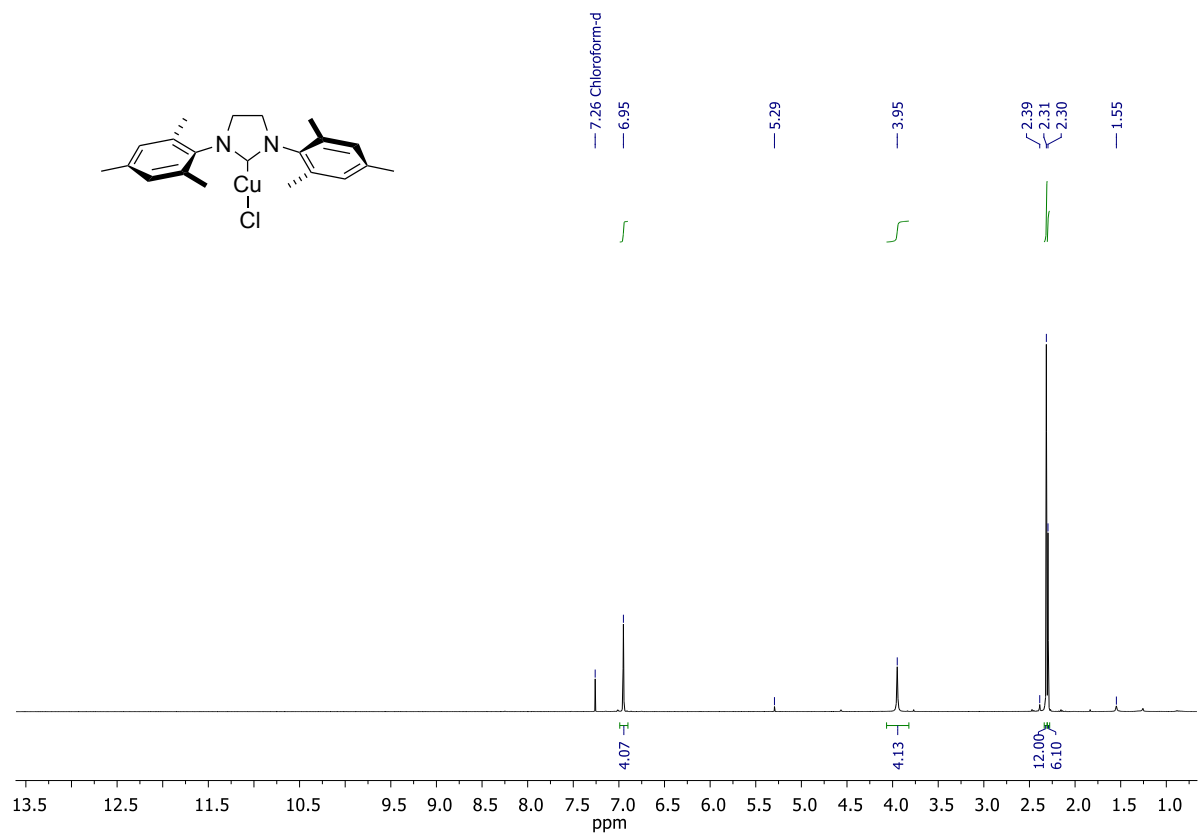

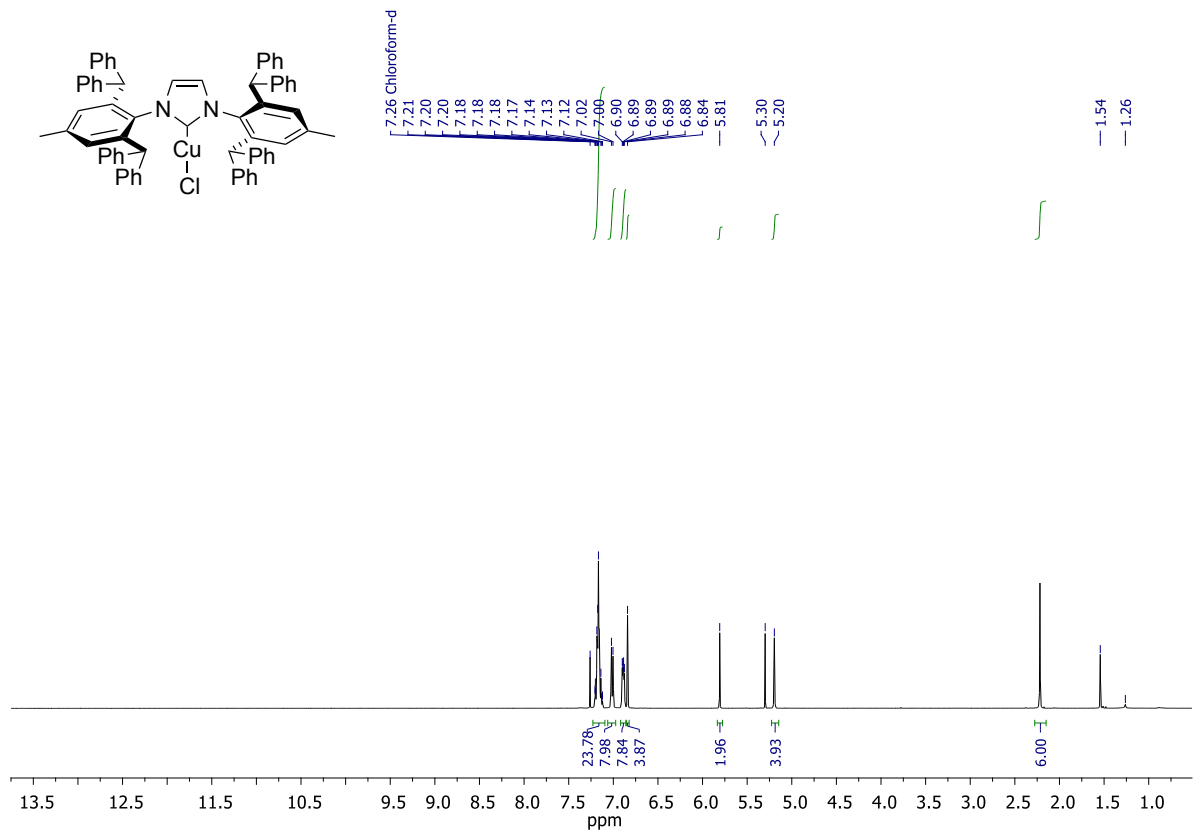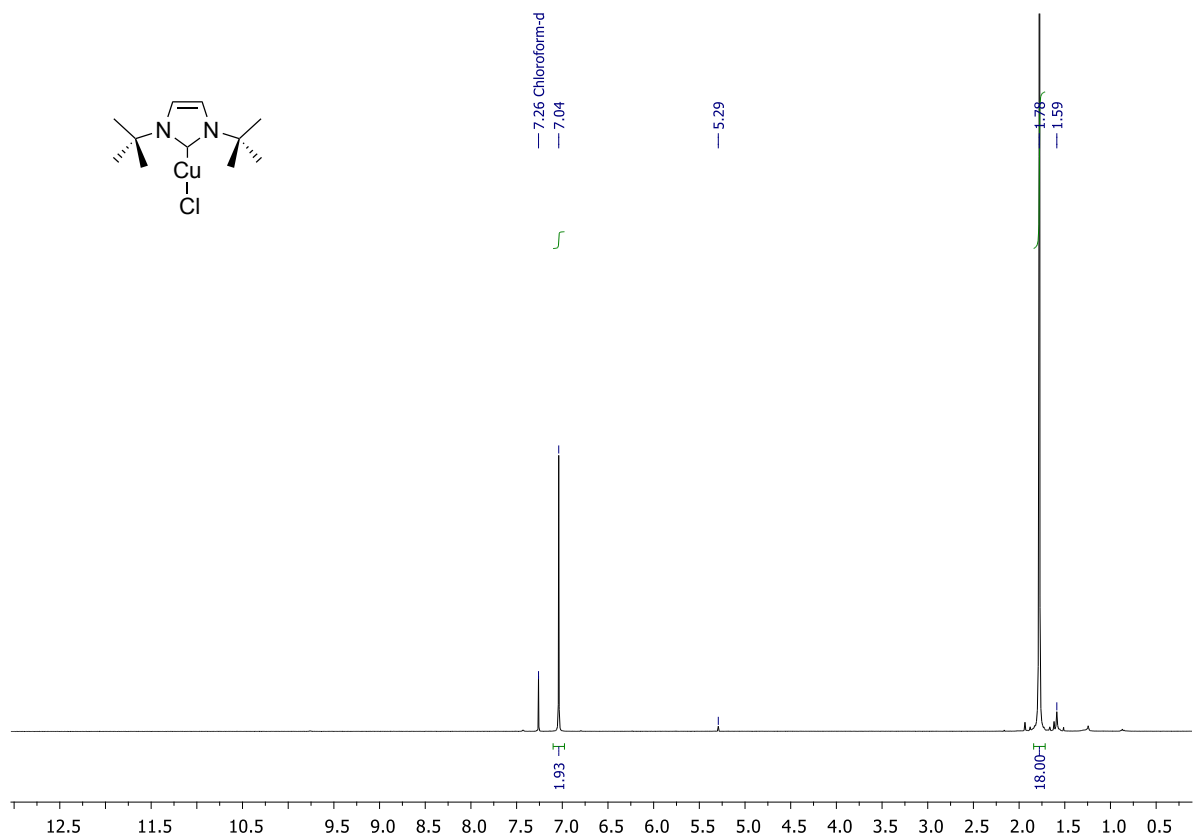

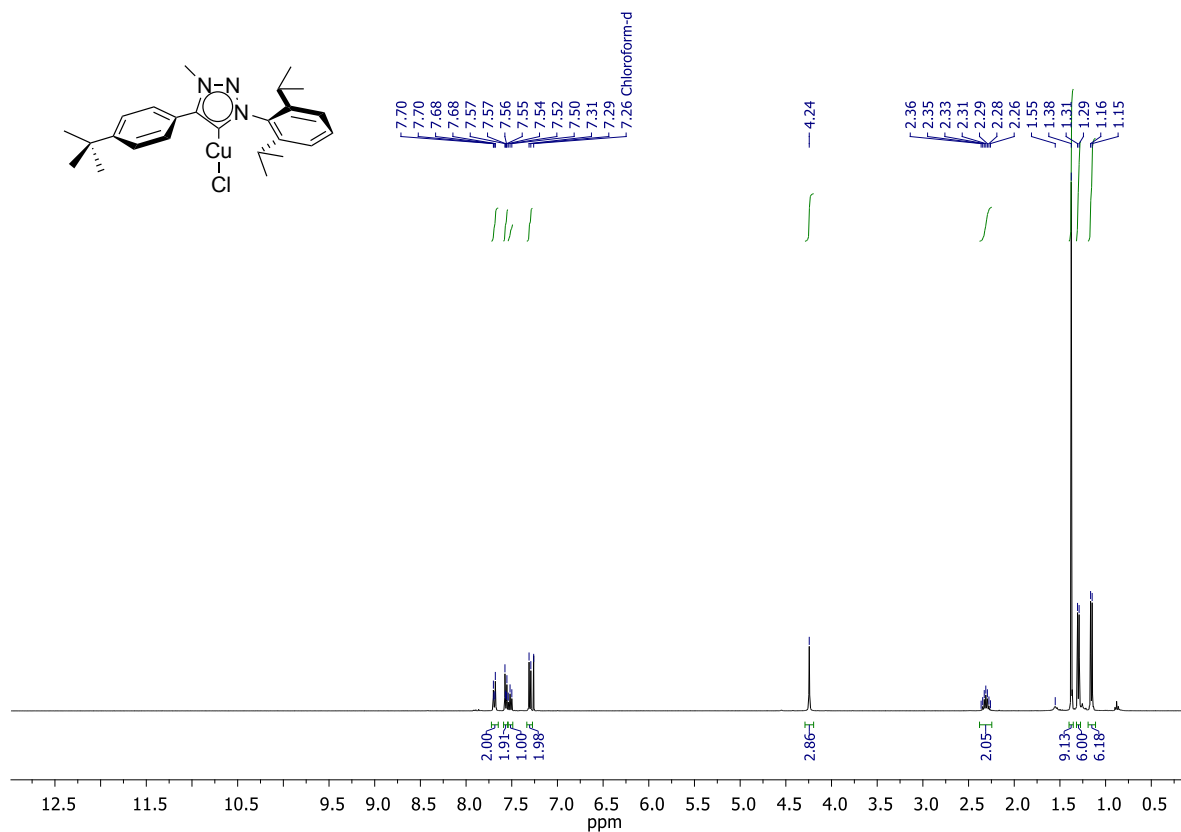

## References

- 1 X. Bantreil and S. P. Nolan, *Nat Protoc.*, 2011, **6**, 69-77.
- 2 M. Hans, J. Lorkowski, A. Demonceau and L. Delaude, *Beilstein J. Org. Chem.*, 2015, **11**, 2318-2325.
- 3 G. Berthon-Gelloz, M. A. Siegler, A. L. Spek, B. Tinant, J. N. H. Reek and I. E. Markó, *Dalton Trans.*, 2010, **39**, 1444-1446.
- 4 S. Paul, B. P. Joy, R. Rajendran and V. B. Gudimetla, *Chemistryselect*, 2019, **4**, 7181-7186.
- 5 Y. D. Bidal, M. Lesieur, M. Melaimi, F. Nahara, D. B. Cordes, K. S. A. Arachchige, A. M. Z. Slawin, G. Bertrand and C. S. J. Cazin, *Adv. Synth. Catal.*, 2015, **357**, 3155-3161.
- 6 O. Santoro, A. Collado, A. M. Z. Slawin, S. P. Nolan and C. S. J. Cazin, *Chem. Commun.*, 2013, **49**, 10483-10485.
